# Supplementary material for: Oxidative dehalogenation of trichlorophenol catalyzed by a promiscuous artificial heme-enzyme
Source: Royal Society of Chemistry journal article supplement (doi:10.1039/d2ra00811d), 2022-01-01
Supplement: d2ra00811d1.pdf [file d2ra00811d1.pdf]

# Electronic Supplementary Information

## Oxidative dehalogenation of trichlorophenol catalyzed by a promiscuous artificial heme-enzyme

Gerardo Zambrano<sup>1</sup>, Alina Sekretareva<sup>2</sup>, Daniele D'Alonzo<sup>1</sup>, Linda Leone<sup>1</sup>, Vincenzo Pavone<sup>1</sup>, Angela Lombardi<sup>1</sup> and Flavia Nastri<sup>1,\*</sup>

<sup>1</sup>Department of Chemical Sciences, University of Napoli Federico II Via Cintia, 80126 Napoli, Italy.

<sup>2</sup>Department of Chemistry – Ångström, Uppsala University, Lägerhyddsvägen 1, 75120 Uppsala, Sweden.

Corresponding author

\*Flavia Nastri

e-mail: [flavia.nastri@unina.it](mailto:flavia.nastri@unina.it)

Phone number: +39081674419

Fax number: +39081674090

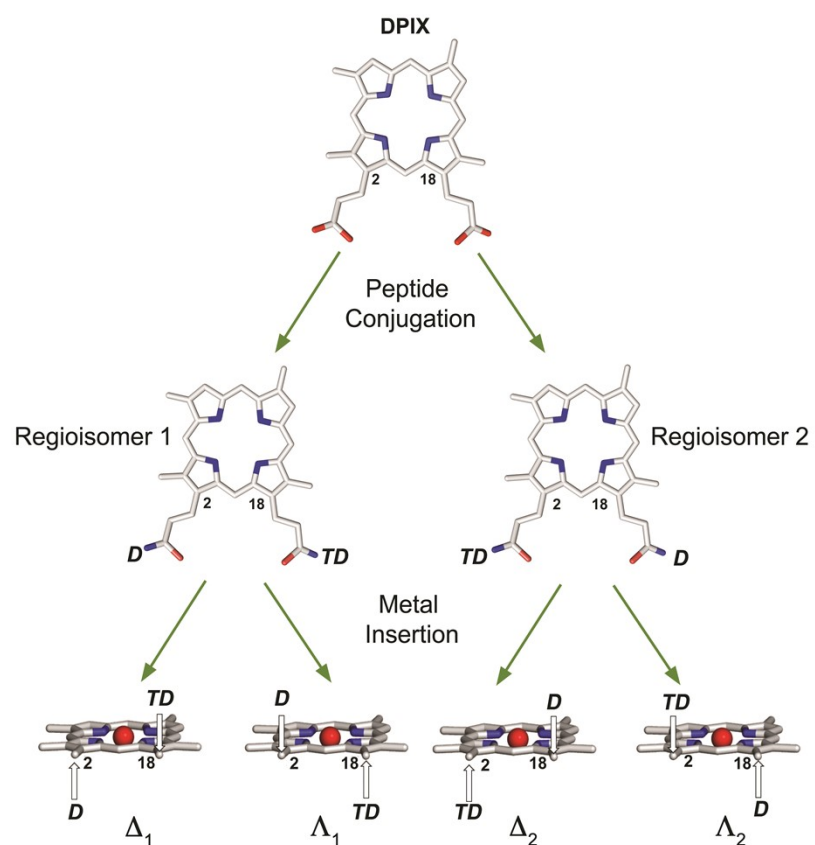

**Figure S1.** Schematic representation of MC6\*a regioisomers and diastereoisomers formation. The decapetide chain and the tetradecapetide chain are indicated as D and TD, respectively. The metal ion is shown as a red sphere. Reproduced from ref. 52 with permission from the Royal Society of Chemistry.

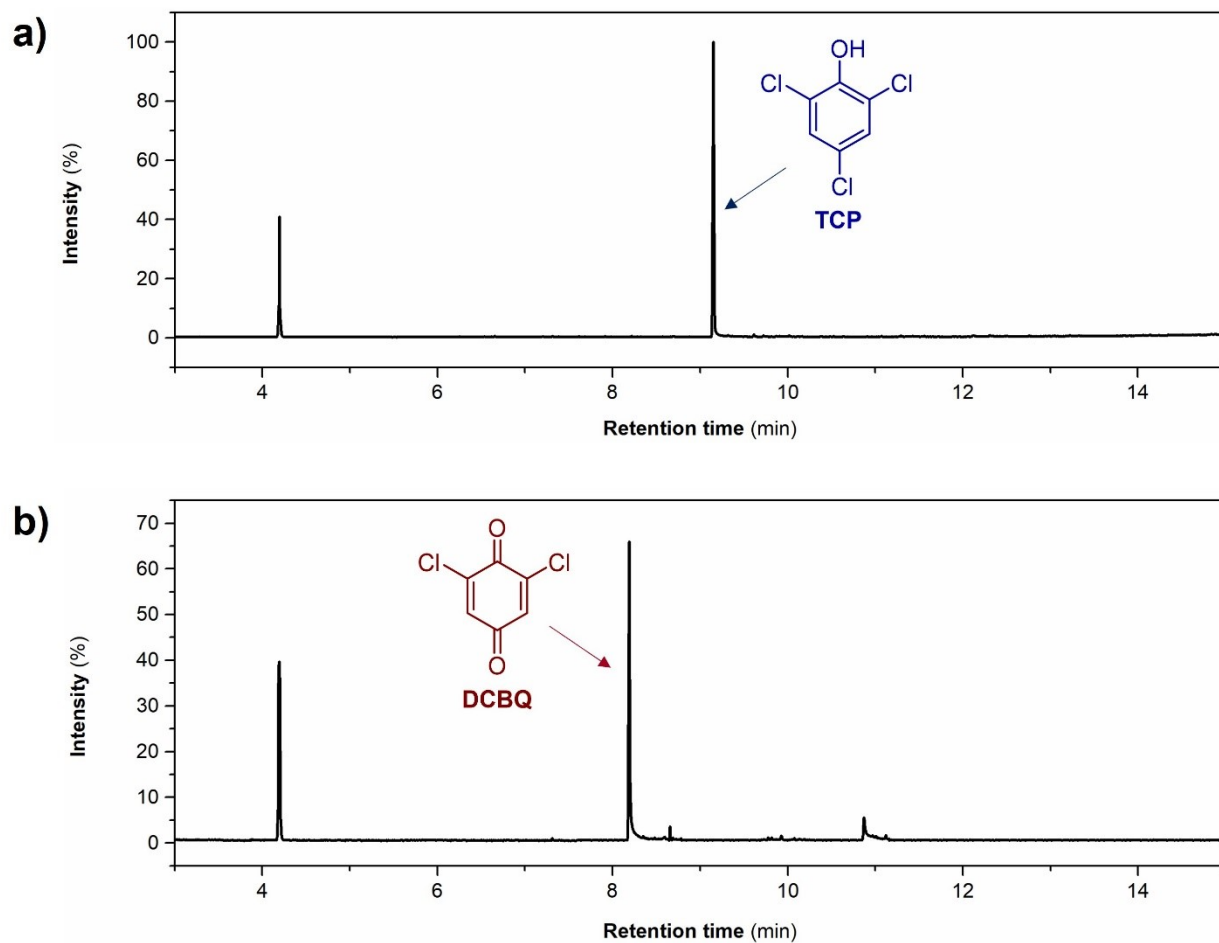

**Figure S2.** GC-MS profile of the FeMC6\*a-catalyzed TCP dehalogenation reaction. Total Ion Current (TIC) chromatograms were acquired (a) before H<sub>2</sub>O<sub>2</sub> addition or (b) 5 min after H<sub>2</sub>O<sub>2</sub> addition. CLB (R<sub>t</sub> 4.152 min) was used as internal standard.

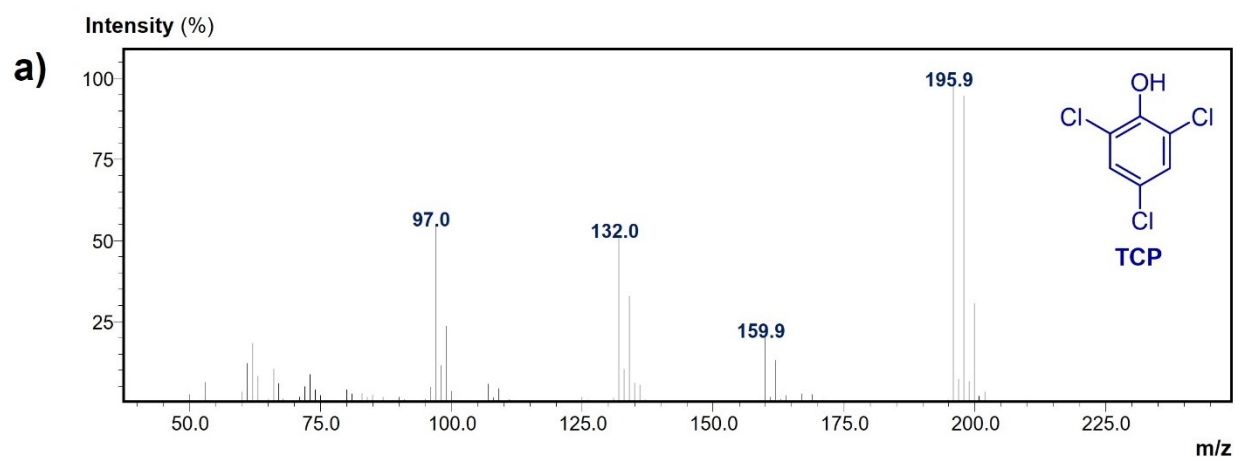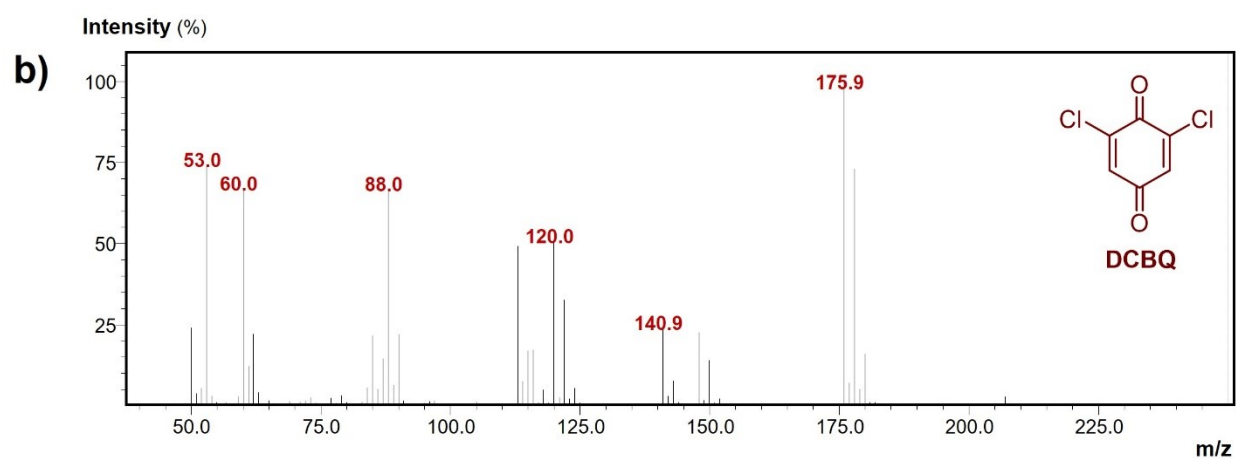

**Figure S3.** a) Mass spectrum of the peak at 9.120 min corresponding to TCP ( $[M]^{++} = 195.9$  amu); b) mass spectrum of the peak at 8.153 min corresponding to DCBQ ( $[M]^{++} = 175.9$  amu).

**Table S1.** Areas of TCP (compared with those of CLB) obtained from GC-MS analysis of the reaction mixture. TIC chromatograms were acquired before ( $t = 0$ ) and after ( $t = 5$  and  $15$  min)  $H_2O_2$  addition.

| <b>Reaction time (min)</b> | <b>CLB (Area)</b> | <b>TCP (Area)</b> |
|----------------------------|-------------------|-------------------|
| $t = 0$                    | 338627            | 1824512           |
| $t = 5$                    | 386522            | 505314            |
| $t = 15$                   | 354266            | 439018            |

*Conditions:* [TCP] = 340  $\mu$ M; [CLB] = 340  $\mu$ M; [ $H_2O_2$ ] = 410  $\mu$ M; [FeMC6\*a] =  $6.7 \cdot 10^{-8}$  M; buffer solution: 50 mM sodium phosphate (pH 6.5) with 50% TFE (v/v).
